# Supplementary material for: Environmentally friendly reduction of a platinum catalyst precursor supported on polypyrrole
Source: Royal Society of Chemistry journal article supplement (doi:10.1039/c3gc40346g), 2013-01-01
Supplement: c3gc40346g.pdf [file c3gc40346g.pdf]

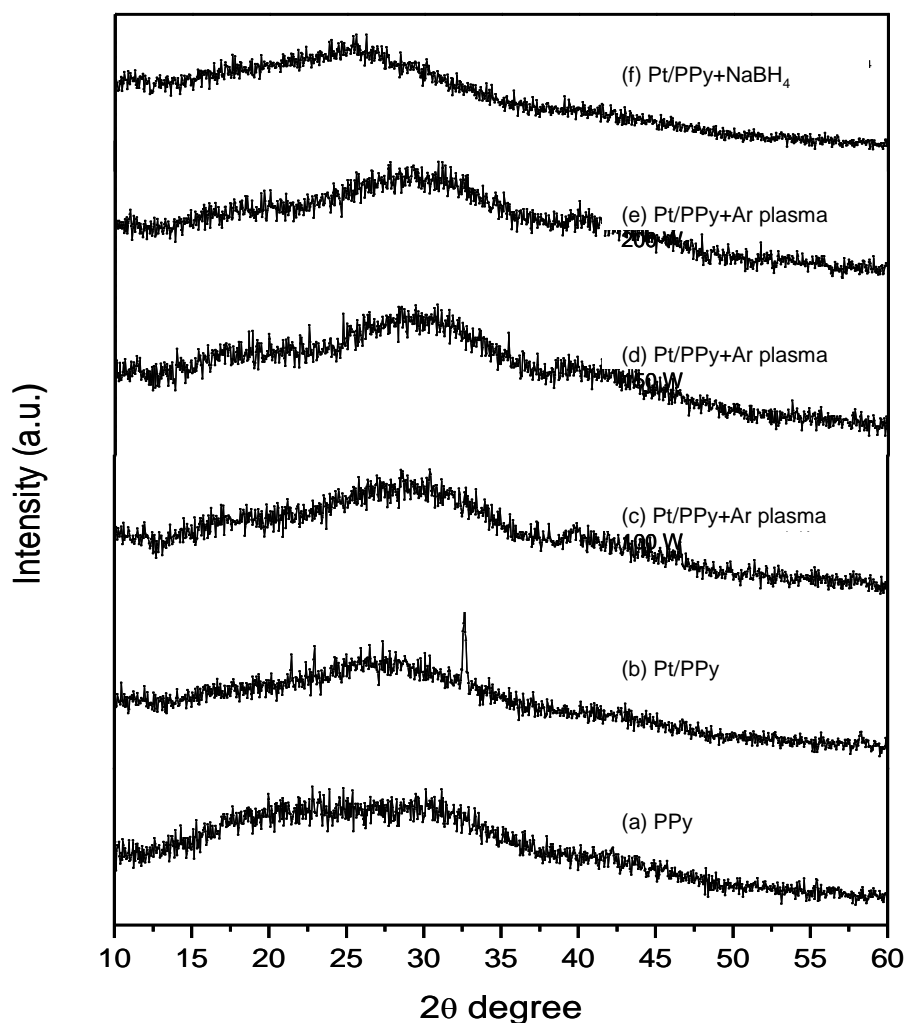

**Supplementary information. Fig. 1.** XRD patterns of: (a) chemically synthesized polypyrrole; (b) polypyrrole impregnated with  $\text{H}_2\text{PtCl}_6$ ; (c-e) polypyrrole impregnated with  $\text{H}_2\text{PtCl}_6$  and treated with Ar plasma 10 min x 6 times at 100, 150 and 200 W; (f) polypyrrole impregnated with  $\text{H}_2\text{PtCl}_6$  and treated with  $\text{NaBH}_4$ .

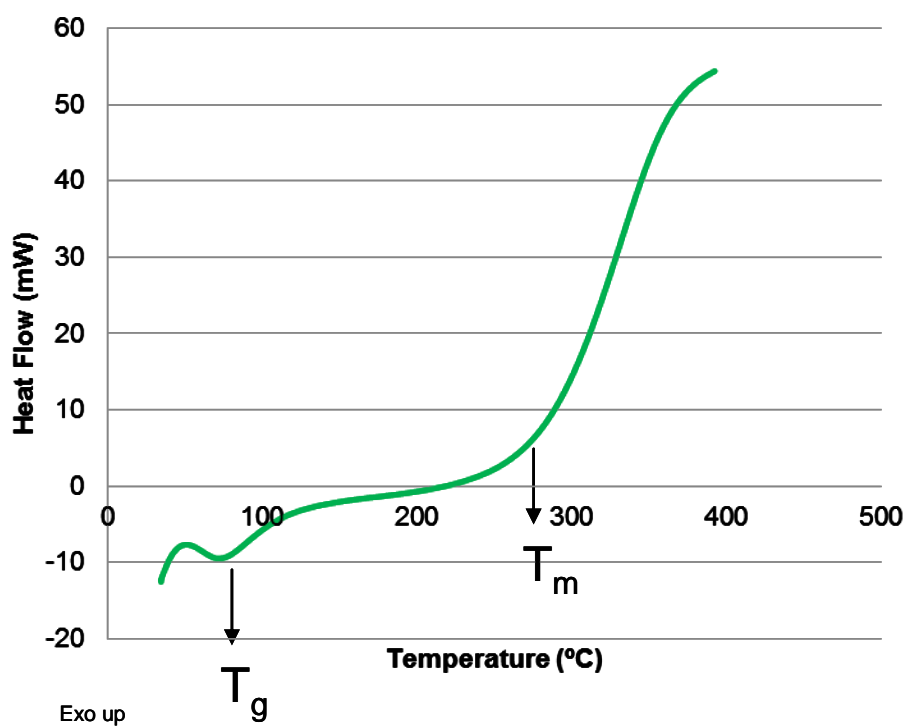

**Supplementary information. Fig. 2.** DSC profile ( $N_2$ , second run) of chemically synthesized polypyrrole with  $FeCl_3$  as oxidant.

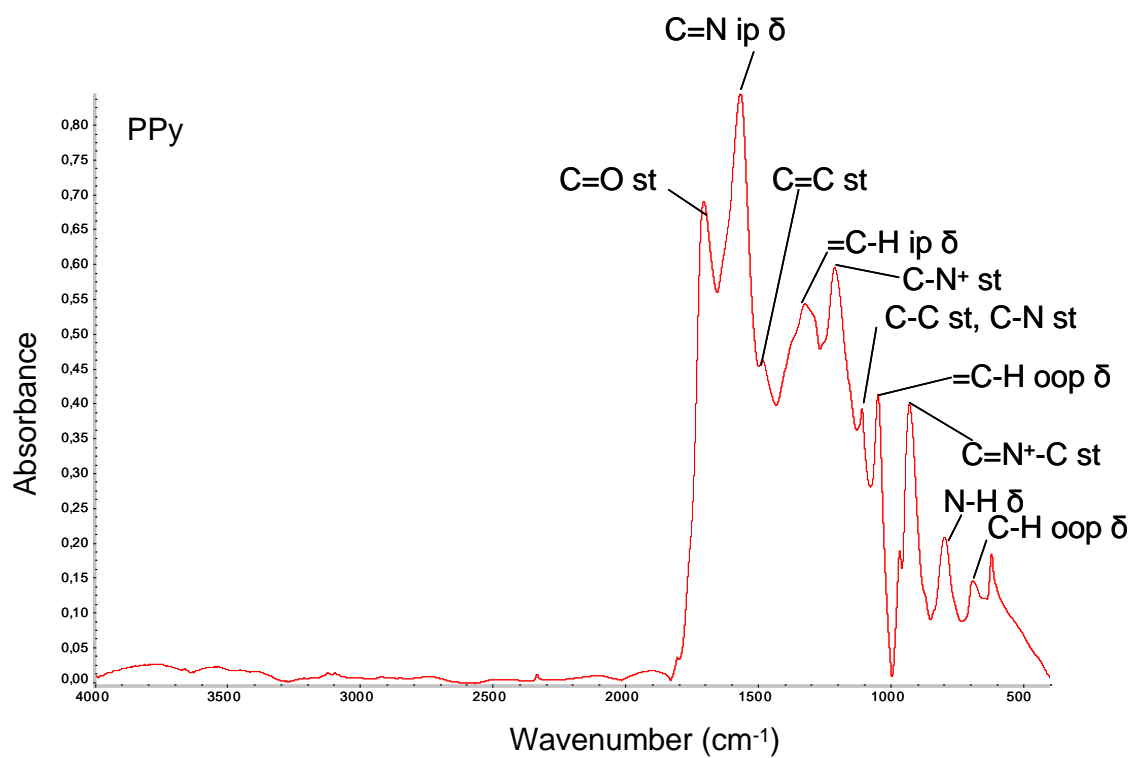

**Supplementary information. Fig. 3.** FTIR spectrum of chemically synthesized polypyrrole with FeCl<sub>3</sub> as oxidant.
